# Supplementary material for: Alterations in Circulating Monocytes Predict COVID-19 Severity and Include Chromatin Modifications Still Detectable Six Months after Recovery
Source: MDPI journal article supplement (doi:10.3390/biomedicines9091253), 2021-09-17
Supplement: s1 [file s1]

## SUPPLEMENTARY FIGURES

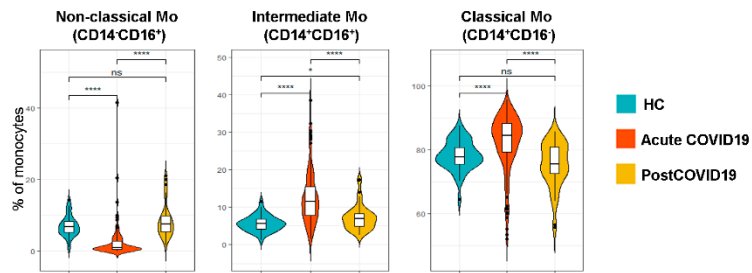

**Supplementary figure S1. Comparison of monocyte subsets in HC, acute and post-COVID-19 patients. \***,  $p < 0.05$ ; **\*\***,  $p < 0.01$ ; **\*\*\***,  $p < 0.001$ ; **\*\*\*\***,  $p < 0.0001$ .

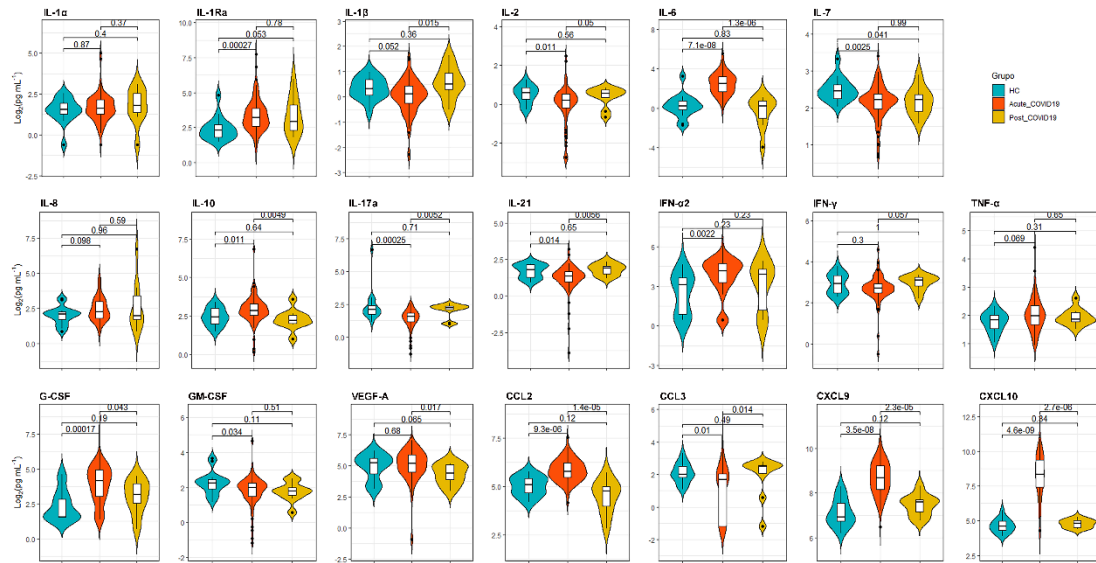

**Supplementary figure S2. Plasma cytokine levels in HC, acute and post-COVID-19 patients.**

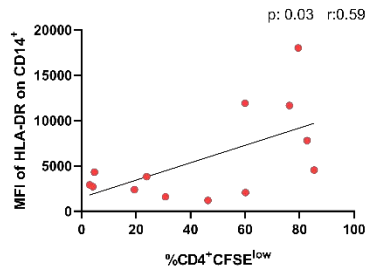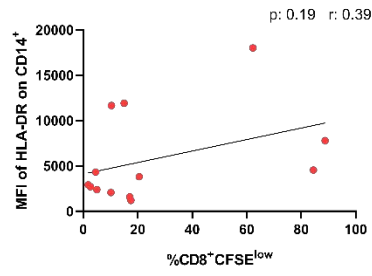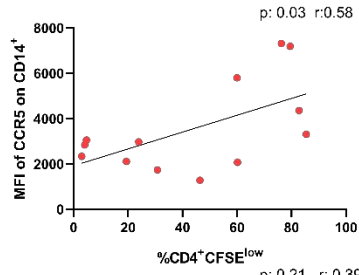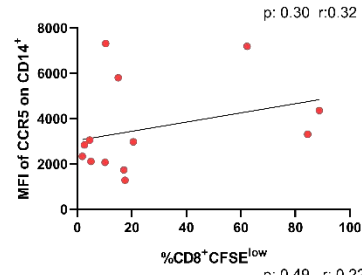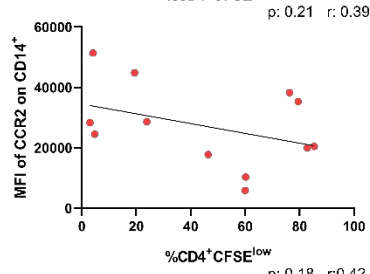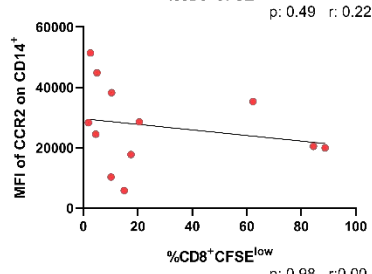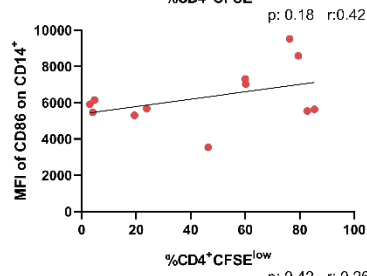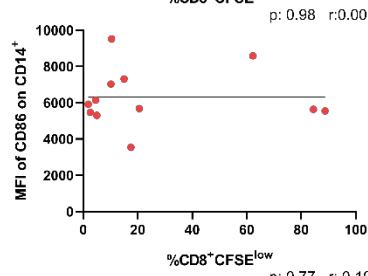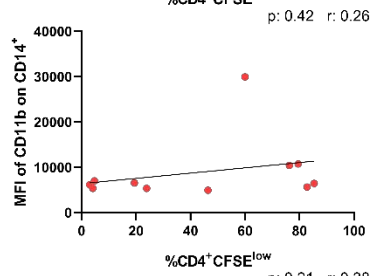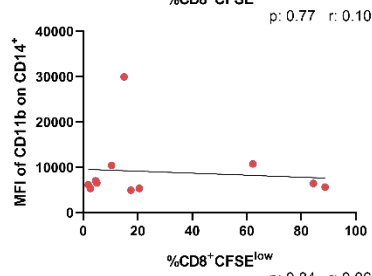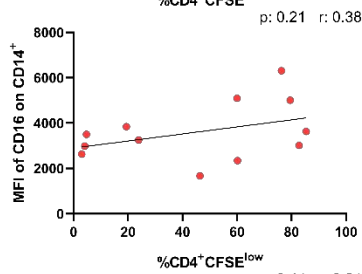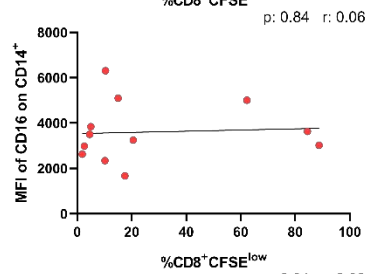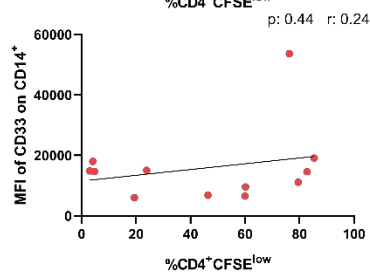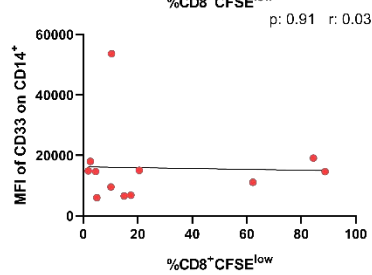

**Supplementary figure S3. Correlation between monocyte surface markers and CD4 and CD8 T cell proliferation in acute COVID-19 patients at ER arrival.**

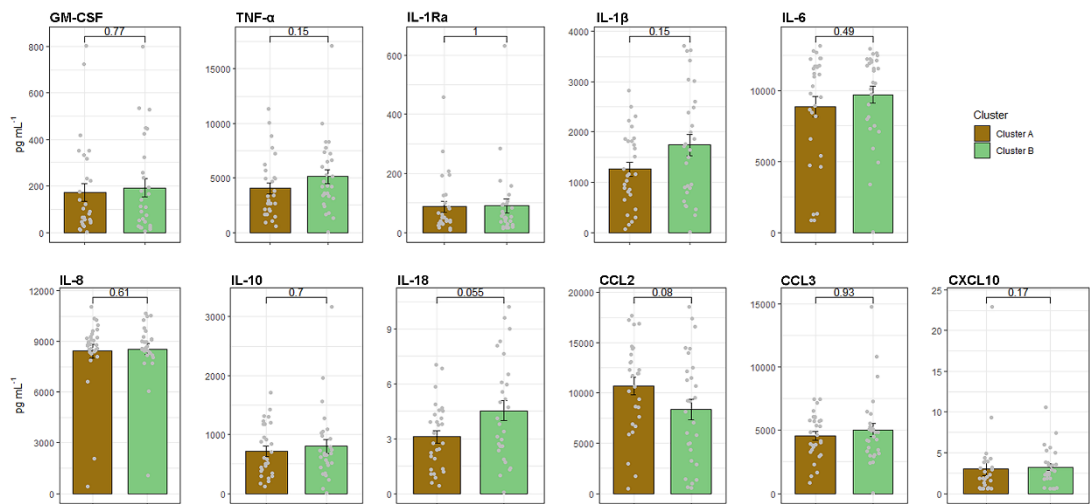

**Supplementary Figure S4. Comparison of cytokine production by LPS-stimulated monocytes from cluster A and B.**

**A**

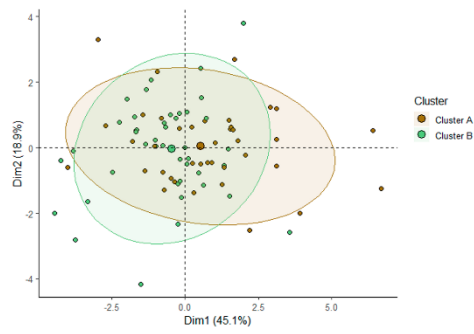

**B**

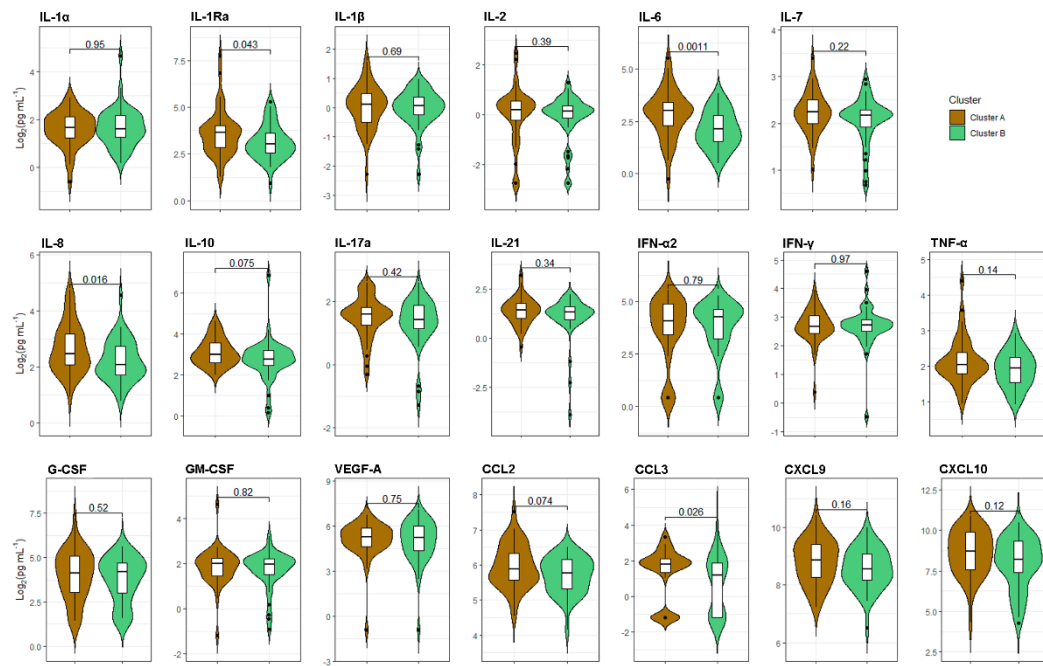

**Supplementary Figure S5. Plasma cytokine levels in cluster A versus B acute COVID-19 patients.** (A) Principal component analysis (PCA) and (B) individual cytokine levels in cluster A versus B. \*,  $p < 0.05$ ; \*\*,  $p < 0.01$ ; \*\*\*,  $p < 0.001$ ; \*\*\*\*,  $p < 0.0001$ .

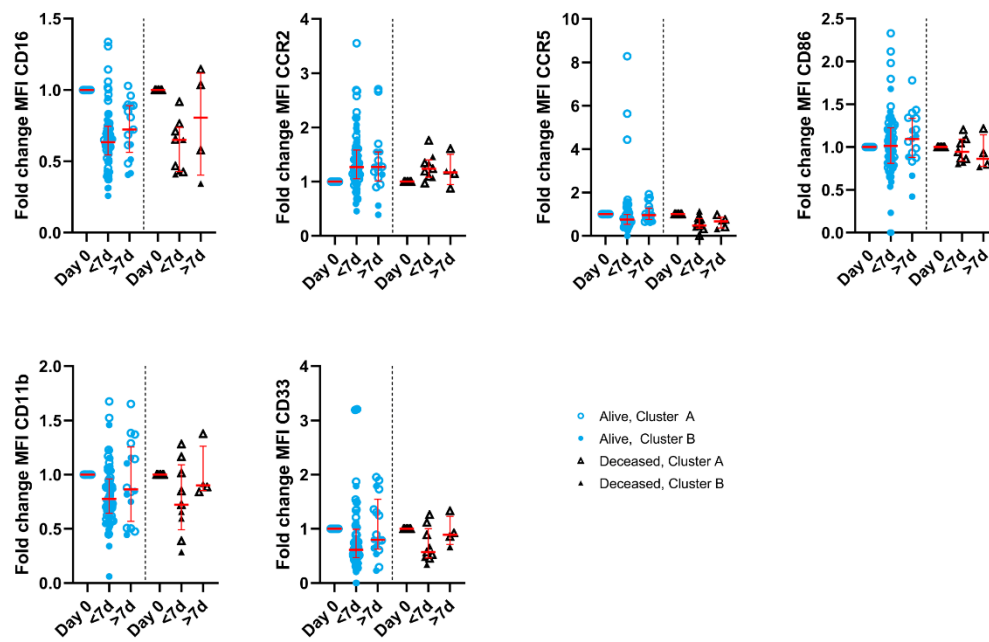

**Supplementary Figure S6. Fold change of monocyte surface markers throughout hospitalization.** Blue points represent discharged patients and black points patients who died. Alive (n=68); deceased (n=8).

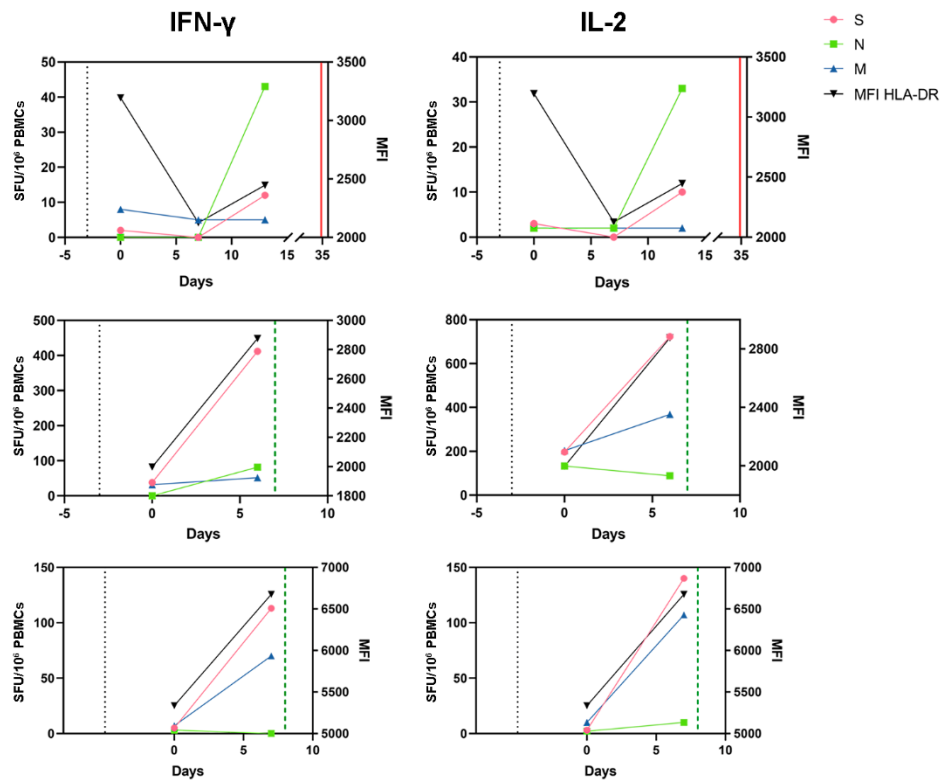

**Supplementary Figure S7. Longitudinal analysis of HLA-DR expression on monocytes and specific T cell response against SARS-CoV-2: correlation in individual examples.** X-axes represent total days (Days of symptoms: <0; days of hospitalization: >0). Day 0 represents emergency room arrival day. Vertical black, dashed lines represent the day of symptoms onset. Vertical red, solid lines represent the day of dying. Vertical green, dashed lines represent the day of discharging

# SUPPLEMENTARY TABLES

**Table S1. Characteristics of acute COVID-19 patients at emergency room arrival and treatment received**

| Variables                                                     | Acute COVID19<br>(N=131) | Cluster A (N=60)  | Cluster B (N=71) | p             |
|---------------------------------------------------------------|--------------------------|-------------------|------------------|---------------|
| Age (Median, [IQR])                                           | 63 [51-77]               | 67 [52-81]        | 62 [50-71]       | 0.13          |
| Sex, male (n, [%])                                            | 89 [67.9%]               | 43 [71.7%]        | 47 [66.2%]       | 0.46          |
| Comorbidities (n, [%])                                        |                          |                   |                  |               |
| Obesity                                                       | 12 [9.2%]                | 5 [8.3%]          | 7 [9.7%]         | 1             |
| Hypertension                                                  | 59 [45%]                 | 30 [50%]          | 29 [40.3%]       | 0.29          |
| Diabetes mellitus                                             | 20 [15.3%]               | 7 [11.7%]         | 13 [18.1%]       | 0.34          |
| Dyslipidemia                                                  | 49 [37.4%]               | 19 [31.7%]        | 30 [41.7%]       | 0.28          |
| ARDS classification, on test day (n, [%])                     |                          |                   |                  | 0.68          |
| None                                                          | 73 [55.7%]               | 31 [51.7%]        | 42 [59.2%]       |               |
| Mild                                                          | 34 [25.9%]               | 16 [26.7%]        | 18 [25.4%]       |               |
| Moderate                                                      | 9 [6.9%]                 | 4 [6.6%]          | 5 [7.0%]         |               |
| Severe                                                        | 15 [11.5%]               | 9 [15.0%]         | 6 [8.4%]         |               |
| Laboratory parameters (Median, [IQR])                         |                          |                   |                  |               |
| SpO <sub>2</sub> /FiO <sub>2</sub>                            | 339 [267-438]            | 339 [269-438]     | 343 [300-443]    | 0.33          |
| Platelets (10 <sup>3</sup> /μL)                               | 219 [170-292]            | 211 [175-300]     | 225 [167-290]    | 0.66          |
| Monocytes (10 <sup>3</sup> /μL)                               | 0.5 [0.4-0.7]            | 0.5 [0.4-0.7]     | 0.5 [0.4-0.6]    | 0.74          |
| Neutrophil/Lymphocyte ratio                                   | 7.2 [4.1-12]             | 8.8 [4.1-15]      | 6.5 [4.1-10]     | 0.12          |
| LDH (U/L)                                                     | 395 [322-480]            | 405 [325-546]     | 389 [307-459]    | 0.10          |
| Albumin (g/dL)                                                | 3.9 [3.7-4.2]            | 3.8 [3.6-4.1]     | 4 [3.7-4.2]      | 0.09          |
| C-reactive protein (mg/dL)                                    | 10.5 [5.8-17.0]          | 13.0 [7.6-24.4]   | 9 [4.8-14.6]     | <b>0.007</b>  |
| IL6 (pg/mL <sup>a</sup> )                                     | 32.5 [19.6-78.9]         | 50.0 [26.8-116.5] | 26.2 [14.4-52.0] | <b>0.0002</b> |
| ALT (U/L)                                                     | 37 [20-64]               | 34 [19.5-56.5]    | 40.5 [21-72.8]   | 0.25          |
| AST (U/L)                                                     | 46 [31-69]               | 47 [29-61]        | 44 [33-71]       | 0.66          |
| Fibrinogen (mg/dL)                                            | 790 [711-938]            | 784 [678-955]     | 791 [746-915]    | 0.90          |
| D-dimer (ng/mL)                                               | 736 [503-1233]           | 745 [561-1126]    | 729 [483-1237]   | 0.48          |
| Viral load, Ct (Median, [IQR])                                | 28.2 [23.4-32.1]         | 25.3 [22.5-32.3]  | 28.9 [24.5-31.9] | 0.43          |
| Days from illness onset to hospital admission (Median, [IQR]) | 7 [4-10]                 | 7 [4-9]           | 8 [5-10]         | 0.12          |
| Days of hospital stay (Median, [IQR])                         | 8 [6-13]                 | 7 [5-12]          | 7 [5-11]         | 0.43          |
| Treatment during hospital stay (n,[%])                        |                          |                   |                  |               |
| Remdesivir                                                    | 45 [34.4%]               | 25 [41.7%]        | 20 [28.2%]       | 0.14          |
| Corticosteroids                                               | 119 [90.8%]              | 56 [93.3%]        | 63 [88.7%]       | 0.55          |
| Azithromycin                                                  | 67 [51.1%]               | 31 [51.7%]        | 36 [50.7%]       | 1             |
| Ceftriaxone                                                   | 113 [86.3%]              | 52 [86.7%]        | 61 [85.9%]       | 1             |
| Tocilizumab                                                   | 31 [23.7%]               | 14 [23.3%]        | 17 [23.9%]       | 1             |
| Oxygen therapy                                                | 112 [85.5%]              | 52 [86.7%]        | 60 [84.5%]       | 0.81          |
| Mechanical ventilation                                        | 44 [33.6%]               | 24 [40.0%]        | 20 [28.2%]       | 0.19          |
| Hyperimmune plasma                                            | 7 [5.3%]                 | 4 [6.7%]          | 3 [4.2%]         | 0.70          |
| Thromboprophylaxis                                            | 127 [96.9%]              | 58 [96.7%]        | 69 [97.2%]       | 1             |
| ICU admission (n,[%])                                         | 21 [16.0%]               | 14 [23.3%]        | 7 [9.7%]         | <b>0.05</b>   |
| Exitus (n, [%])                                               | 18 [13.7%]               | 14 [23.3%]        | 4 [5.6%]         | <b>0.03</b>   |

<sup>a</sup> Analyzed by Cytometry Bead Assay



**Table S2. Characteristics of post-COVID-19 patients**

| <b>Variables</b>                                            | <b>Post-COVID-19 (N=52)</b> |
|-------------------------------------------------------------|-----------------------------|
| Age (Median, [IQR])                                         | 65 [50-74]                  |
| Sex, male (n, [%])                                          | 29 [55.8%]                  |
| Comorbidities (n, [%])                                      |                             |
| Obesity                                                     | 2 [3.8%]                    |
| Hypertension                                                | 19 [36.5%]                  |
| Diabetes mellitus                                           | 9 [17.3%]                   |
| Dyslipidemia                                                | 16 [30.8%]                  |
| Laboratory parameters at hospital admission (Median, [IQR]) |                             |
| Oxygen saturation                                           | 98 [95-98]                  |
| Platelets (x10 <sup>3</sup> cells/ $\mu$ L)                 | 219 [182-241]               |
| Monocytes (x10 <sup>3</sup> cells/ $\mu$ L)                 | 0.5 [0.3-0.7]               |
| Neutrophil/Lymphocyte ratio                                 | 5.3 [3.8-8.4]               |
| LDH (U/L)                                                   | 366 [305-375]               |
| Albumin (g/dL)                                              | 4.1 [3.8-4.3]               |
| C-reactive protein (mg/dL)                                  | 9.2 [4.8-12.9]              |
| Fibrinogen (mg/dL)                                          | 767 [675-835]               |
| Current laboratory parameters (Median, [IQR])               |                             |
| SpO <sub>2</sub> /FiO <sub>2</sub>                          | > 96%                       |
| Platelets (x10 <sup>3</sup> cells/ $\mu$ L)                 | 226.5 [197.0-263.8]         |
| Monocytes (x10 <sup>3</sup> cells/ $\mu$ L)                 | 0.5 [0.4-0.6]               |
| Neutrophil/Lymphocyte ratio                                 | 1.6 [1.4-2.0]               |
| LDH (U/L)                                                   | 192 [171-219]               |
| Albumin (g/dL)                                              | 4.7 [4.5-4.8]               |
| C-reactive protein (mg/dL)                                  | 0.14 [0.07-0.30]            |
| Fibrinogen (mg/dL)                                          | 415 [358-457]               |
| Long-COVID symptoms (n, [%])                                |                             |
| Dyspnea                                                     | 8 [15.4%]                   |
| Asthenia                                                    | 8 [15.4%]                   |
| Tachycardia                                                 | 3 [5.8%]                    |
| Myalgia                                                     | 6 [11.5%]                   |
| Arthralgias                                                 | 6 [11.5%]                   |
